# Supplementary material for: Unveiling Sex-Based Differences in the Effects of Alcohol Abuse: A Comprehensive Functional Meta-Analysis of Transcriptomic Studies
Source: MDPI journal article supplement (doi:10.3390/genes11091106), 2020-09-21

**Figure S5. Summary of main functional groups of cellular components by sex.** Each treemap depicts the significant functions overrepresented in women (a) and men (b). Treemaps are organized into two levels: the first level visualizes the most general functional groups in Gene Ontology hierarchy as large rectangles, while the second level represents the significant cellular components that integrate each functional group by small rectangles of the same color.

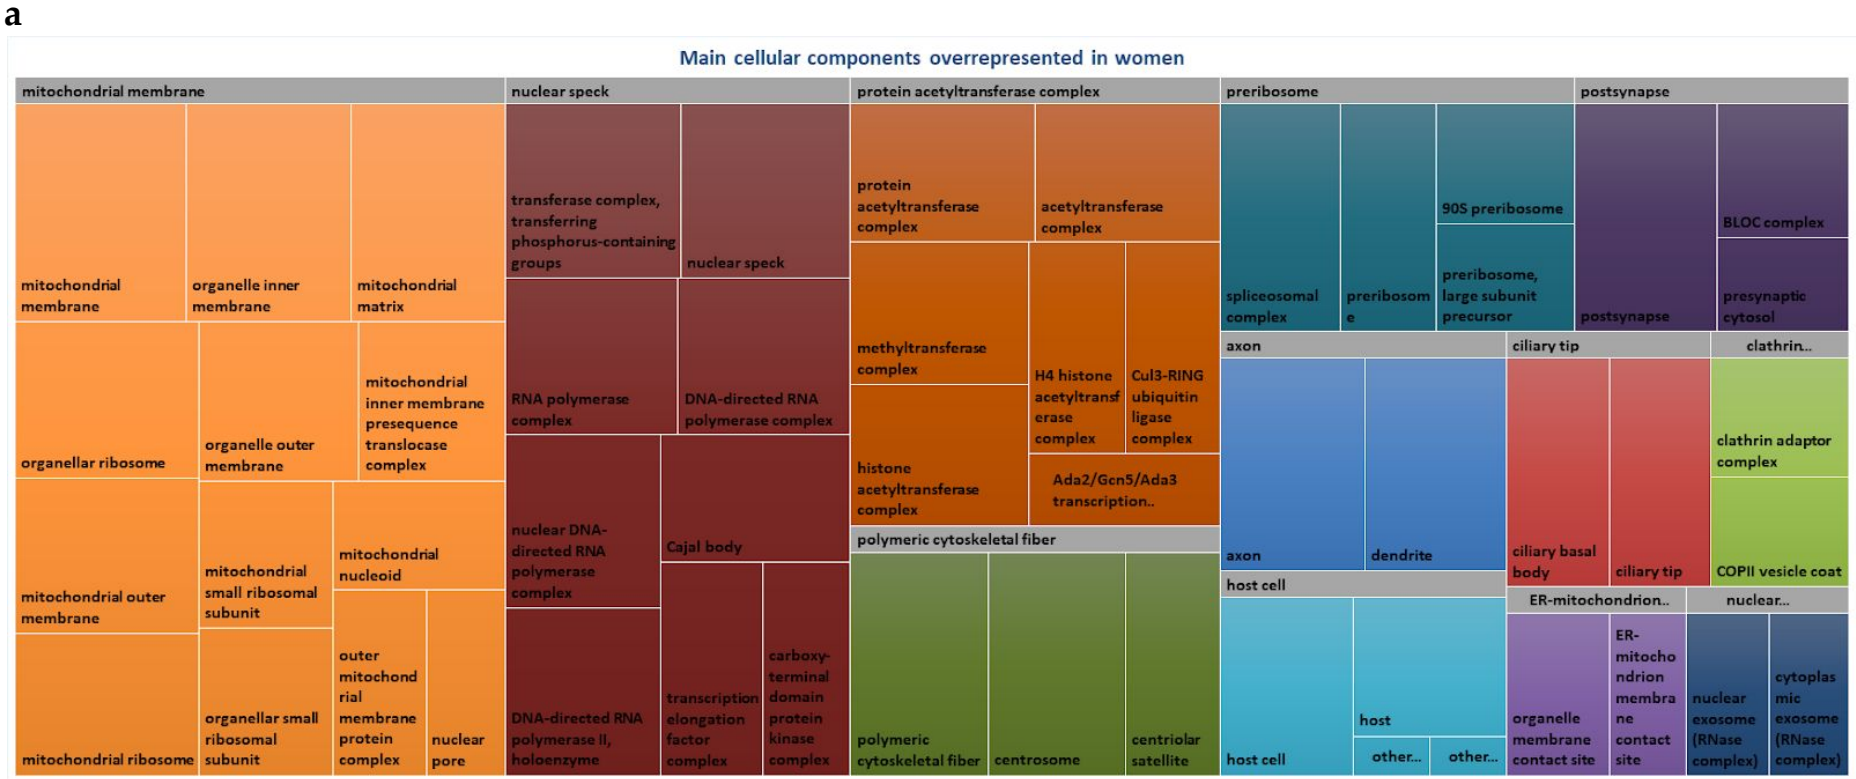

b

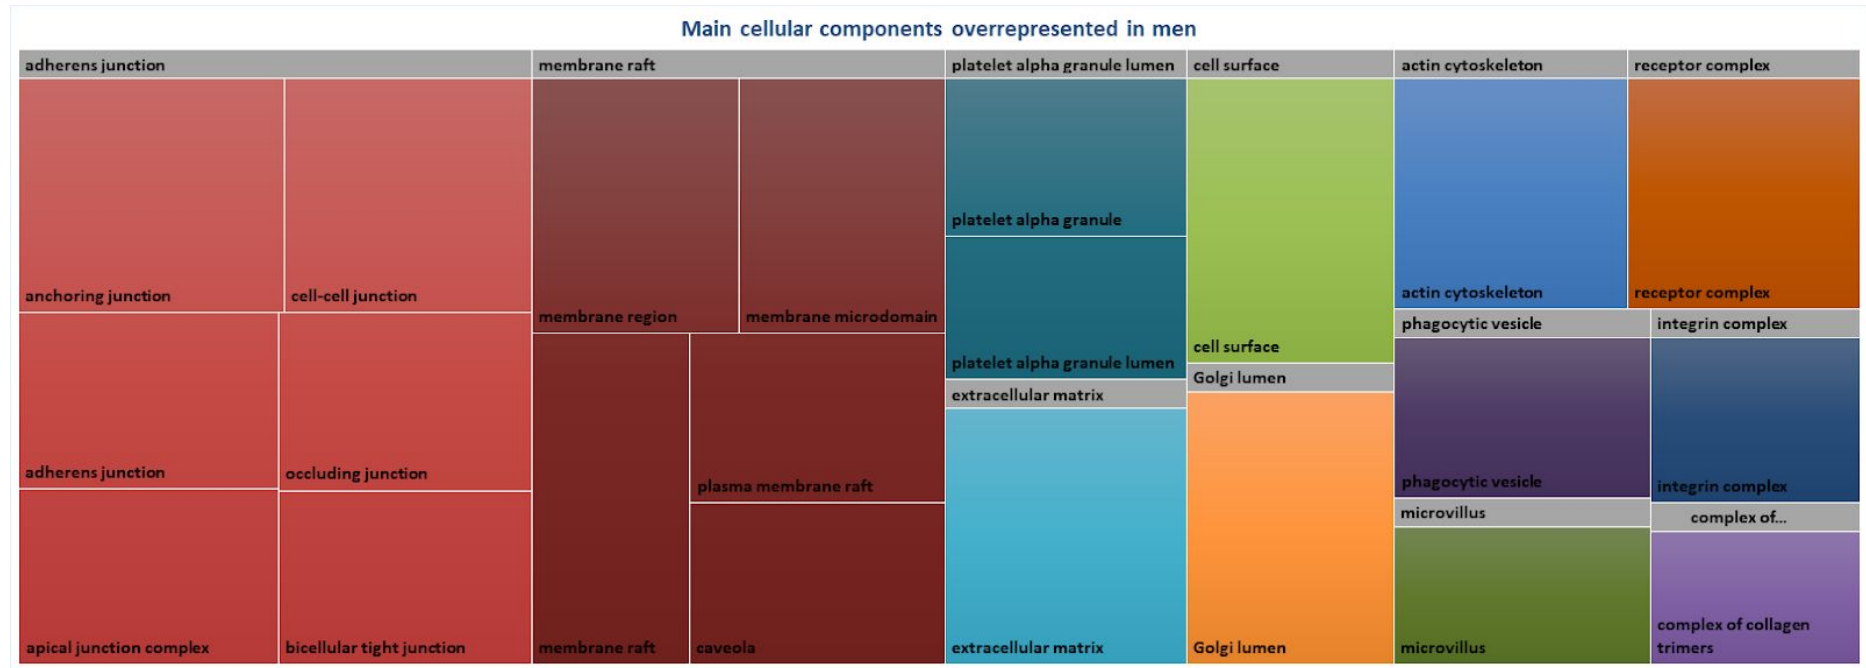

Supplement: s1 [file s1]
