# Supplementary material for: Unveiling Sex-Based Differences in the Effects of Alcohol Abuse: A Comprehensive Functional Meta-Analysis of Transcriptomic Studies
Source: MDPI journal article supplement (doi:10.3390/genes11091106), 2020-09-21
Supplement: s1 [file s1]

**Figure S7. Summary of main functional groups of biological processes by sex.** Each treemap depicts the significant functions overrepresented in women (a) and men (b). Treemaps are organized into two levels: the first level visualizes the most general functional groups in Gene Ontology hierarchy as large rectangles, while the second level represents the significant biological processes that integrate each functional group by small rectangles of the same color.

**a**

**Main biological processes overrepresented in women**

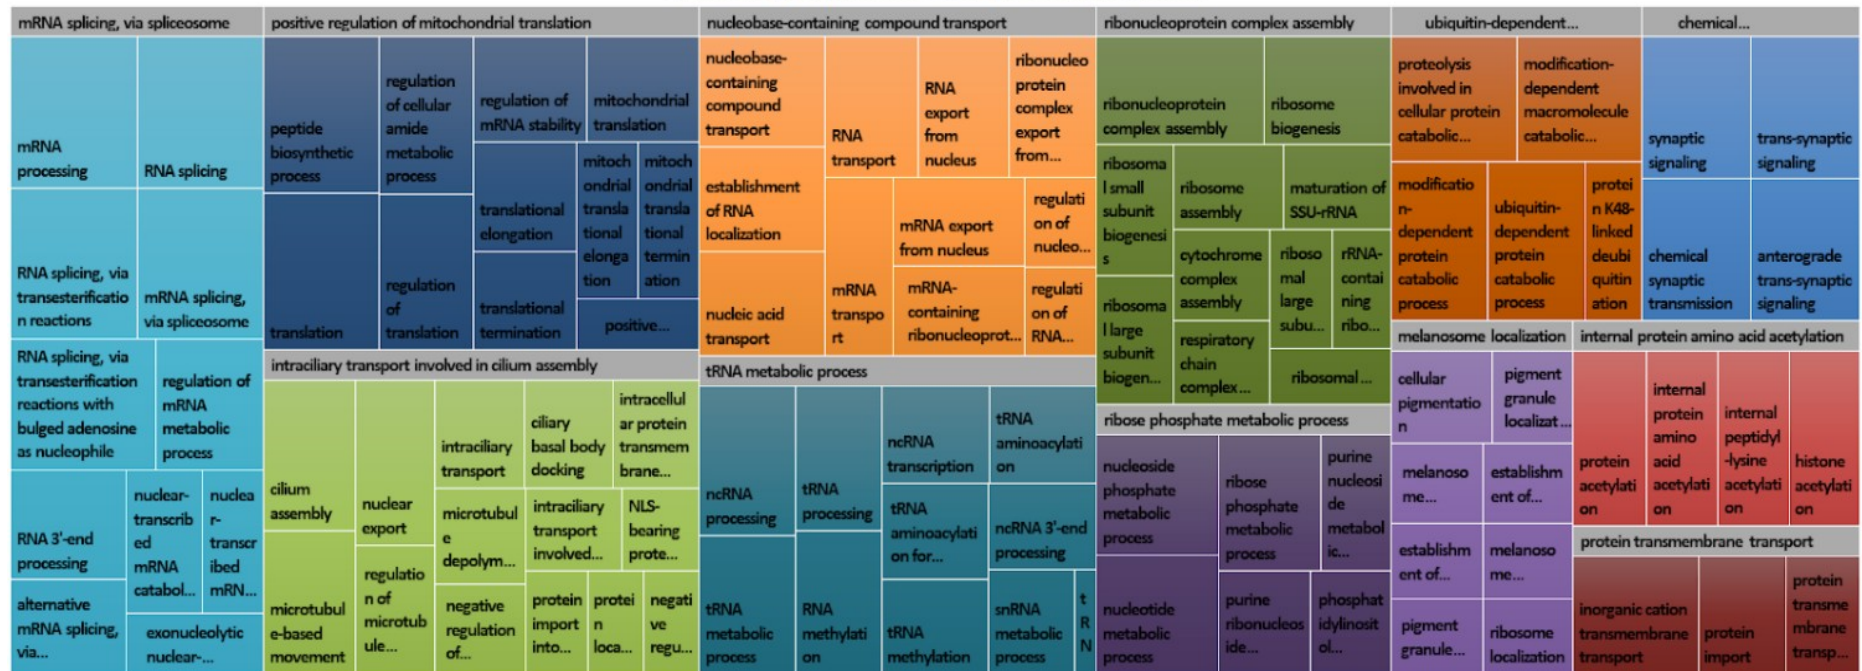

b

## Main biological processes overrepresented in men

| regulation of cell migration                |                                     |                                     |                                            |                     | blood vessel morphogenesis                   |                            |                       | hemopoiesis                            |                                             | epithelial cell differentiation   |                                |                                   |                                      | response to other organism                  |                           |                                     | inflammatory response          |                                       |                               |                               |
|---------------------------------------------|-------------------------------------|-------------------------------------|--------------------------------------------|---------------------|----------------------------------------------|----------------------------|-----------------------|----------------------------------------|---------------------------------------------|-----------------------------------|--------------------------------|-----------------------------------|--------------------------------------|---------------------------------------------|---------------------------|-------------------------------------|--------------------------------|---------------------------------------|-------------------------------|-------------------------------|
| regulation of cell migration                | taxis                               | chemotaxis                          | positive regulation of locomotion          |                     | vasculature development                      | tube morphogenesis         |                       | regulation of immune response          | hematopoietic or lymphoid organ development | tissue morphogenesis              | cartilage development          | neural crest cell differentiat... | response to external biotic stimulus | regulation of response to external stimulus | response to bacterium     | innate immune response              | regulation of defense response | negative regulation of response to... |                               |                               |
|                                             |                                     |                                     |                                            |                     |                                              |                            |                       |                                        |                                             |                                   |                                |                                   |                                      |                                             |                           |                                     |                                |                                       |                               |                               |
| positive regulation of cellular componen... |                                     |                                     |                                            |                     | heart development                            | embryonic morphogenesis    |                       | positive regulation of immune response | lymphocyte activation                       |                                   |                                |                                   |                                      |                                             |                           |                                     |                                |                                       |                               |                               |
|                                             | leukocyte migration                 | cell chemotaxis                     | leukocyte chemotaxis                       |                     |                                              |                            |                       |                                        |                                             | epithelial cell differentiation   |                                |                                   |                                      |                                             |                           |                                     |                                |                                       |                               |                               |
|                                             |                                     |                                     |                                            |                     | embryo development ending in birth or egg... | blood vessel morphogenesis |                       |                                        | activation of immune response               |                                   |                                |                                   |                                      |                                             |                           |                                     |                                |                                       |                               |                               |
|                                             |                                     |                                     |                                            |                     | angiogenesis                                 |                            |                       |                                        |                                             |                                   |                                |                                   |                                      |                                             |                           |                                     |                                |                                       |                               |                               |
| myeloid leukocyte migration                 | positive regulation of leukocyte... | granulocyte chemotaxis              | regulation of leukocyte chemotaxis         |                     |                                              |                            |                       | hemopoiesis                            |                                             | regulation of cytokine production |                                |                                   |                                      | negative regulation of...                   | cytokine...               |                                     | bone remodeling                |                                       |                               |                               |
|                                             |                                     |                                     |                                            |                     |                                              |                            |                       |                                        |                                             |                                   |                                |                                   |                                      |                                             |                           |                                     |                                |                                       |                               |                               |
|                                             | regulation of mononuclear cell...   | positive regulation of leukocyte... | positive regulation of monocyte chemotaxis | monocyte chemotaxis | cardiovascular system development            | blood vessel development   | inner ear development | regulation of cell activation          | sensory organ development                   | myeloid cell differentiation      | regulation of interleukin-1... | interleukin-1 beta production     | regulation of interleukin-1...       | neural precursor cell...                    | regulation of epitheli... | cytokine-mediated signaling pathway | response to growth factor      | bone remodeling                       | regulation of bone remodeling | regulation of bone remodeling |
| mononuclear cell migration                  |                                     |                                     |                                            |                     |                                              |                            |                       |                                        |                                             |                                   |                                |                                   |                                      |                                             |                           |                                     |                                |                                       |                               |                               |
|                                             |                                     |                                     |                                            |                     |                                              |                            |                       |                                        |                                             |                                   |                                |                                   |                                      |                                             |                           |                                     |                                |                                       |                               |                               |
|                                             |                                     |                                     |                                            |                     |                                              |                            |                       |                                        |                                             |                                   |                                |                                   |                                      |                                             |                           |                                     |                                |                                       |                               |                               |
|                                             |                                     |                                     |                                            |                     |                                              |                            |                       |                                        |                                             |                                   |                                |                                   |                                      |                                             |                           |                                     |                                |                                       |                               |                               |
|                                             |                                     |                                     |                                            |                     |                                              |                            |                       |                                        |                                             |                                   |                                |                                   |                                      |                                             |                           |                                     |                                |                                       |                               |                               |
|                                             |                                     |                                     |                                            |                     |                                              |                            |                       |                                        |                                             |                                   |                                |                                   |                                      |                                             |                           |                                     |                                |                                       |                               |                               |
|                                             |                                     |                                     |                                            |                     |                                              |                            |                       |                                        |                                             |                                   |                                |                                   |                                      |                                             |                           |                                     |                                |                                       |                               |                               |
|                                             |                                     |                                     |                                            |                     |                                              |                            |                       |                                        |                                             |                                   |                                |                                   |                                      |                                             |                           |                                     |                                |                                       |                               |                               |
|                                             |                                     |                                     |                                            |                     |                                              |                            |                       |                                        |                                             |                                   |                                |                                   |                                      |                                             |                           |                                     |                                |                                       |                               |                               |
|                                             |                                     |                                     |                                            |                     |                                              |                            |                       |                                        |                                             |                                   |                                |                                   |                                      |                                             |                           |                                     |                                |                                       |                               |                               |
|                                             |                                     |                                     |                                            |                     |                                              |                            |                       |                                        |                                             |                                   |                                |                                   |                                      |                                             |                           |                                     |                                |                                       |                               |                               |
|                                             |                                     |                                     |                                            |                     |                                              |                            |                       |                                        |                                             |                                   |                                |                                   |                                      |                                             |                           |                                     |                                |                                       |                               |                               |
|                                             |                                     |                                     |                                            |                     |                                              |                            |                       |                                        |                                             |                                   |                                |                                   |                                      |                                             |                           |                                     |                                |                                       |                               |                               |
|                                             |                                     |                                     |                                            |                     |                                              |                            |                       |                                        |                                             |                                   |                                |                                   |                                      |                                             |                           |                                     |                                |                                       |                               |                               |
|                                             |                                     |                                     |                                            |                     |                                              |                            |                       |                                        |                                             |                                   |                                |                                   |                                      |                                             |                           |                                     |                                |                                       |                               |                               |
|                                             |                                     |                                     |                                            |                     |                                              |                            |                       |                                        |                                             |                                   |                                |                                   |                                      |                                             |                           |                                     |                                |                                       |                               |                               |
|                                             |                                     |                                     |                                            |                     |                                              |                            |                       |                                        |                                             |                                   |                                |                                   |                                      |                                             |                           |                                     |                                |                                       |                               |                               |
|                                             |                                     |                                     |                                            |                     |                                              |                            |                       |                                        |                                             |                                   |                                |                                   |                                      |                                             |                           |                                     |                                |                                       |                               |                               |
|                                             |                                     |                                     |                                            |                     |                                              |                            |                       |                                        |                                             |                                   |                                |                                   |                                      |                                             |                           |                                     |                                |                                       |                               |                               |
|                                             |                                     |                                     |                                            |                     |                                              |                            |                       |                                        |                                             |                                   |                                |                                   |                                      |                                             |                           |                                     |                                |                                       |                               |                               |
|                                             |                                     |                                     |                                            |                     |                                              |                            |                       |                                        |                                             |                                   |                                |                                   |                                      |                                             |                           |                                     |                                |                                       |                               |                               |
|                                             |                                     |                                     |                                            |                     |                                              |                            |                       |                                        |                                             |                                   |                                |                                   |                                      |                                             |                           |                                     |                                |                                       |                               |                               |
|                                             |                                     |                                     |                                            |                     |                                              |                            |                       |                                        |                                             |                                   |                                |                                   |                                      |                                             |                           |                                     |                                |                                       |                               |                               |
|                                             |                                     |                                     |                                            |                     |                                              |                            |                       |                                        |                                             |                                   |                                |                                   |                                      |                                             |                           |                                     |                                |                                       |                               |                               |
|                                             |                                     |                                     |                                            |                     |                                              |                            |                       |                                        |                                             |                                   |                                |                                   |                                      |                                             |                           |                                     |                                |                                       |                               |                               |
|                                             |                                     |                                     |                                            |                     |                                              |                            |                       |                                        |                                             |                                   |                                |                                   |                                      |                                             |                           |                                     |                                |                                       |                               |                               |
|                                             |                                     |                                     |                                            |                     |                                              |                            |                       |                                        |                                             |                                   |                                |                                   |                                      |                                             |                           |                                     |                                |                                       |                               |                               |
|                                             |                                     |                                     |                                            |                     |                                              |                            |                       |                                        |                                             |                                   |                                |                                   |                                      |                                             |                           |                                     |                                |                                       |                               |                               |
|                                             |                                     |                                     |                                            |                     |                                              |                            |                       |                                        |                                             |                                   |                                |                                   |                                      |                                             |                           |                                     |                                |                                       |                               |                               |
|                                             |                                     |                                     |                                            |                     |                                              |                            |                       |                                        |                                             |                                   |                                |                                   |                                      |                                             |                           |                                     |                                |                                       |                               |                               |
|                                             |                                     |                                     |                                            |                     |                                              |                            |                       |                                        |                                             |                                   |                                |                                   |                                      |                                             |                           |                                     |                                |                                       |                               |                               |
|                                             |                                     |                                     |                                            |                     |                                              |                            |                       |                                        |                                             |                                   |                                |                                   |                                      |                                             |                           |                                     |                                |                                       |                               |                               |
|                                             |                                     |                                     |                                            |                     |                                              |                            |                       |                                        |                                             |                                   |                                |                                   |                                      |                                             |                           |                                     |                                |                                       |                               |                               |
|                                             |                                     |                                     |                                            |                     |                                              |                            |                       |                                        |                                             |                                   |                                |                                   |                                      |                                             |                           |                                     |                                |                                       |                               |                               |
|                                             |                                     |                                     |                                            |                     |                                              |                            |                       |                                        |                                             |                                   |                                |                                   |                                      |                                             |                           |                                     |                                |                                       |                               |                               |
|                                             |                                     |                                     |                                            |                     |                                              |                            |                       |                                        |                                             |                                   |                                |                                   |                                      |                                             |                           |                                     |                                |                                       |                               |                               |
|                                             |                                     |                                     |                                            |                     |                                              |                            |                       |                                        |                                             |                                   |                                |                                   |                                      |                                             |                           |                                     |                                |                                       |                               |                               |
|                                             |                                     |                                     |                                            |                     |                                              |                            |                       |                                        |                                             |                                   |                                |                                   |                                      |                                             |                           |                                     |                                |                                       |                               |                               |
|                                             |                                     |                                     |                                            |                     |                                              |                            |                       |                                        |                                             |                                   |                                |                                   |                                      |                                             |                           |                                     |                                |                                       |                               |                               |
|                                             |                                     |                                     |                                            |                     |                                              |                            |                       |                                        |                                             |                                   |                                |                                   |                                      |                                             |                           |                                     |                                |                                       |                               |                               |
|                                             |                                     |                                     |                                            |                     |                                              |                            |                       |                                        |                                             |                                   |                                |                                   |                                      |                                             |                           |                                     |                                |                                       |                               |                               |
|                                             |                                     |                                     |                                            |                     |                                              |                            |                       |                                        |                                             |                                   |                                |                                   |                                      |                                             |                           |                                     |                                |                                       |                               |                               |
|                                             |                                     |                                     |                                            |                     |                                              |                            |                       |                                        |                                             |                                   |                                |                                   |                                      |                                             |                           |                                     |                                |                                       |                               |                               |
|                                             |                                     |                                     |                                            |                     |                                              |                            |                       |                                        |                                             |                                   |                                |                                   |                                      |                                             |                           |                                     |                                |                                       |                               |                               |
|                                             |                                     |                                     |                                            |                     |                                              |                            |                       |                                        |                                             |                                   |                                |                                   |                                      |                                             |                           |                                     |                                |                                       |                               |                               |
|                                             |                                     |                                     |                                            |                     |                                              |                            |                       |                                        |                                             |                                   |                                |                                   |                                      |                                             |                           |                                     |                                |                                       |                               |                               |
|                                             |                                     |                                     |                                            |                     |                                              |                            |                       |                                        |                                             |                                   |                                |                                   |                                      |                                             |                           |                                     |                                |                                       |                               |                               |
|                                             |                                     |                                     |                                            |                     |                                              |                            |                       |                                        |                                             |                                   |                                |                                   |                                      |                                             |                           |                                     |                                |                                       |                               |                               |
|                                             |                                     |                                     |                                            |                     |                                              |                            |                       |                                        |                                             |                                   |                                |                                   |                                      |                                             |                           |                                     |                                |                                       |                               |                               |
|                                             |                                     |                                     |                                            |                     |                                              |                            |                       |                                        |                                             |                                   |                                |                                   |                                      |                                             |                           |                                     |                                |                                       |                               |                               |
|                                             |                                     |                                     |                                            |                     |                                              |                            |                       |                                        |                                             |                                   |                                |                                   |                                      |                                             |                           |                                     |                                |                                       |                               |                               |
|                                             |                                     |                                     |                                            |                     |                                              |                            |                       |                                        |                                             |                                   |                                |                                   |                                      |                                             |                           |                                     |                                |                                       |                               |                               |
|                                             |                                     |                                     |                                            |                     |                                              |                            |                       |                                        |                                             |                                   |                                |                                   |                                      |                                             |                           |                                     |                                |                                       |                               |                               |
|                                             |                                     |                                     |                                            |                     |                                              |                            |                       |                                        |                                             |                                   |                                |                                   |                                      |                                             |                           |                                     |                                |                                       |                               |                               |
