# Supplementary material for: Unveiling Sex-Based Differences in the Effects of Alcohol Abuse: A Comprehensive Functional Meta-Analysis of Transcriptomic Studies
Source: MDPI journal article supplement (doi:10.3390/genes11091106), 2020-09-21
Supplement: s1 [file s1]

**Table S1.** Software and versions used in this work.

| Software / R package           | Version |
|--------------------------------|---------|
| R                              | 3.5.1   |
| affy                           | 1.62.0  |
| annotate                       | 1.62.0  |
| AnnotationDbi                  | 1.44.0  |
| Biobase                        | 2.42.0  |
| biomaRt                        | 2.38.0  |
| dplyr                          | 0.7.8   |
| edgeR                          | 3.24.3  |
| GEOQuery                       | 2.50.5  |
| ggdendro                       | 0.1-20  |
| ggplot2                        | 3.1.0   |
| ggpubr                         | 0.2     |
| GO.db                          | 3.8.2   |
| hgu133plus2.db                 | 3.2.3   |
| hugene10sttranscriptcluster.db | 8.7.0   |
| illuminaHumanv4.db             | 1.26.0  |
| KEGG.db                        | 3.2.3   |
| limma                          | 3.38.3  |
| mdgsa                          | 1.14.0  |
| metafor                        | 2.1-0   |
| metap                          | 1.1     |
| methods                        | 3.5.3   |
| org.Hs.eg.db                   | 3.7.0   |
| pd.hugene.1.9.st.v1            | 3.14.1  |
| tidyr                          | 0.8.3   |
| UpSetR                         | 1.3.3   |
| utils                          | 3.5.3   |

**Metafun-AUD** web tool is freely available in <https://bioinfo.cipf.es/metafun-aud>
