# Supplementary material for: Unveiling Sex-Based Differences in the Effects of Alcohol Abuse: A Comprehensive Functional Meta-Analysis of Transcriptomic Studies
Source: MDPI journal article supplement (doi:10.3390/genes11091106), 2020-09-21

**Figure S1.** UpSet plots showing the number of common and specific Biological Process GO in women (a) and men (b).

**a**

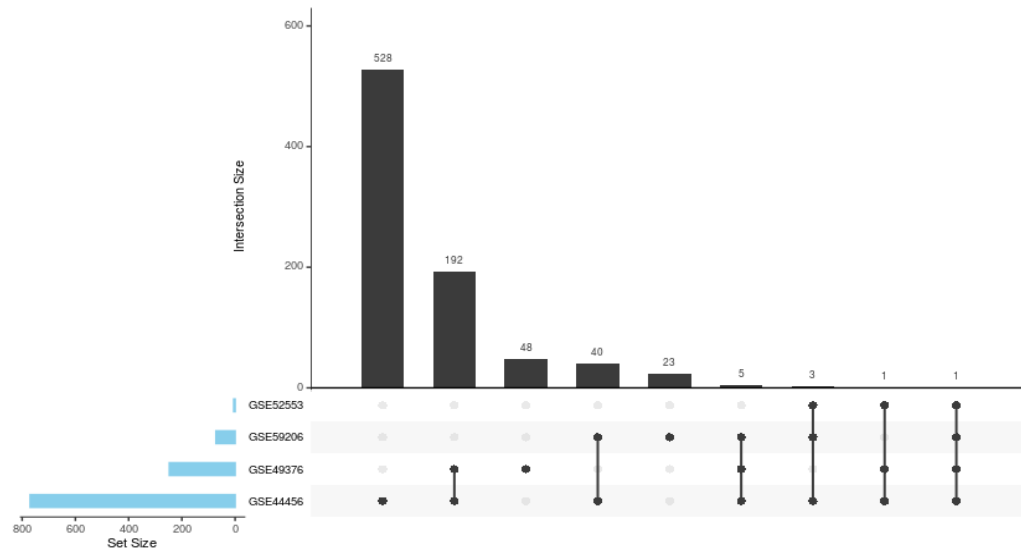

**b**

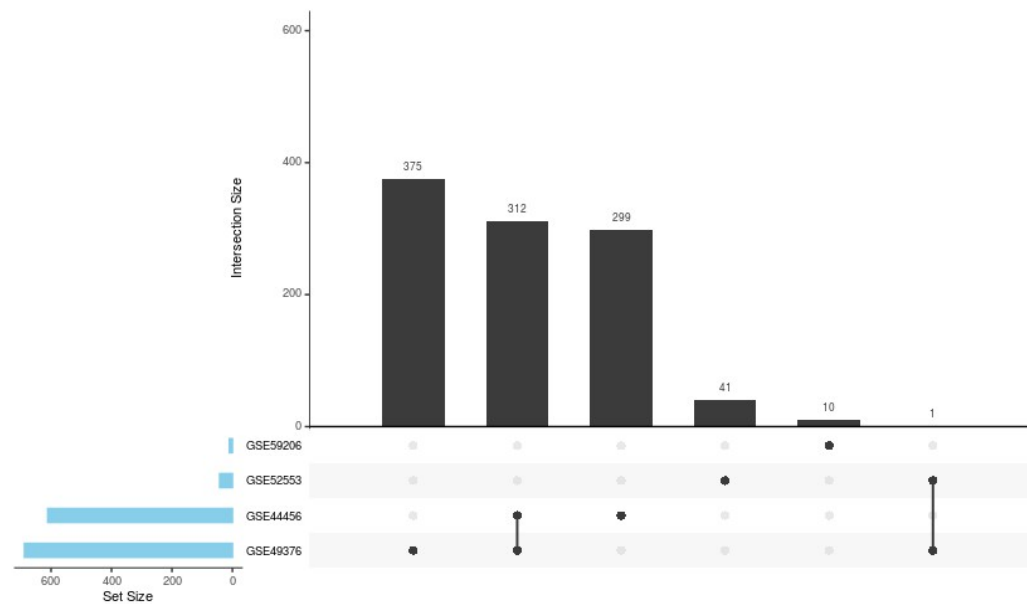

Supplement: s1 [file s1]
